# Supplementary material
Source: PubMed Central journal article supplement (PMC9957738)
Supplement: mmc1.pdf [file mmc1.pdf]

## Supplementary Appendix

### Table of Contents

|                                                                                                                                                                                                                                                                                                                                                                                    |           |
|------------------------------------------------------------------------------------------------------------------------------------------------------------------------------------------------------------------------------------------------------------------------------------------------------------------------------------------------------------------------------------|-----------|
| <i>List of participants by institution .....</i>                                                                                                                                                                                                                                                                                                                                   | <b>3</b>  |
| <i>Supplementary Methods .....</i>                                                                                                                                                                                                                                                                                                                                                 | <b>6</b>  |
| <i>Supplementary Table 1: Modified Charlson Comorbidity Index (mCCI). .....</i>                                                                                                                                                                                                                                                                                                    | <b>7</b>  |
| <i>Supplementary Table 2: Data dictionary used for the analysis .....</i>                                                                                                                                                                                                                                                                                                          | <b>8</b>  |
| <i>Supplementary Table 3: Inclusion and exclusion criteria. ....</i>                                                                                                                                                                                                                                                                                                               | <b>10</b> |
| <i>Supplementary Table 4: Standardized mean differences before and after inverse probability treatment weighting (IPTW) of all included variables .....</i>                                                                                                                                                                                                                        | <b>11</b> |
| <i>Supplementary Table 5: Distribution of patients with cancer in each of the three cohorts analyzed (i.e. unvaccinated, 2 and 3 doses of mRNA vaccines) according to the categories of solid and hematological malignancies. ....</i>                                                                                                                                             | <b>12</b> |
| <i>Supplementary Table 6: Results of multivariable logistic regression analysis for the primary endpoint of 30-day mortality, and the secondary endpoints of ICU admission and/or MV, and hospitalization. ....</i>                                                                                                                                                                | <b>13</b> |
| <i>Supplementary Table 7: Results of the sensitivity analysis using a multivariable logistic regression model with IPTW truncated at the lower and upper 2.5<sup>th</sup> percentiles, after removing cases with “possible” vaccination status, for the primary endpoint of 30-day mortality and the secondary endpoints of ICU admission and/or MV, and hospitalization. ....</i> | <b>14</b> |
| <i>Supplementary Table 8: Results of the sensitivity analysis using a multivariable logistic regression model with IPTW truncated at the lower and upper 1<sup>st</sup> percentiles, for the primary endpoint of 30-day mortality and the secondary endpoints of ICU admission and/or MV, and hospitalization. ....</i>                                                            | <b>15</b> |
| <i>Supplementary Table 9: Results of multivariable binary logistic regression analysis using IPTW for comparing three study groups diagnosed with COVID-19, where cancer stage was included in the models for the primary endpoint of 30-day mortality, and the secondary endpoints of ICU admission and/or MV, and hospitalization. ....</i>                                      | <b>16</b> |
| <i>Supplementary Table 10: Results of multivariable binary logistic regression analysis using IPTW truncated at the lower and upper 2.5<sup>th</sup> percentiles for comparing three study groups diagnosed with COVID-19, where cluster-robust standard errors were implemented to adjust the estimates for the participating institution (sensitivity analysis). ....</i>        | <b>17</b> |
| <i>Supplementary Table 11: Results of multivariable binary logistic regression analysis using IPTW for comparing three study groups diagnosed with COVID-19 from October 2021 to March 2022 only, for the primary endpoint of 30-day mortality, and the secondary endpoints of ICU admission and/or MV, and hospitalization (sensitivity analysis).....</i>                        | <b>18</b> |
| <i>Supplementary Table 12: Results of multivariable binary logistic regression analysis using IPTW truncated at the lower and upper 2.5<sup>th</sup> percentiles for comparing three study groups diagnosed with COVID-19, where only patients who received 3 doses or 2 doses were included and compared (sensitivity analysis). ....</i>                                         | <b>19</b> |

***Supplementary Table 13: Results of multivariable logistic regression analysis for comparing three study groups diagnosed with COVID-19, where IPTW was not used for balancing covariates distributions, for the primary and secondary endpoints. .... 20***

***Supplementary Table 14: Non-adjusted odds ratios and associated p-values for vaccination status subgroups in relation to primary endpoint of 30-day mortality and the secondary endpoints of ICU/MV and hospitalization..... 21***

## List of participants by institution

Alphabetical list of participants by institution that contributed at least one record to the analysis.

**Bolded** = site PI/co-PIs; site co-investigators are listed alphabetically by last name.

- **Balazs Halmos, MD; Amit Verma, MBBS**; Benjamin A. Gartrell, MD; Sanjay Goel, MBBS; Nitin Ohri, MD; R. Alejandro Sica, MD; Astha Thakkar, MD (Albert Einstein College of Medicine, Montefiore Medical Center, Bronx, NY, USA)
- **Keith E. Stockerl-Goldstein, MD**; Omar Butt, MD, PhD; Jian Li Campian, MD, PhD; Mark A. Fiala, MSW; Jeffrey P. Henderson, MD, PhD; Ryan S. Monahan, MBA; Alice Y. Zhou, MD, PhD (Alvin J. Siteman Cancer Center at Washington University School of Medicine and Barnes-Jewish Hospital, St. Louis, MO, USA)
- **Sigrun Hallmeyer, MD**; Pamela Bohachek, RN, CCRC; Daniel Mundt, MD; Sasirekha Pandravada, DO; Mauli Patel, DO; Mitrianna Streckfuss, MPH; Eyob Tadesse, MD; Michael A. Thompson, MD, PhD, FASCO (Aurora Cancer Care, Advocate Aurora Health, Milwaukee, WI, USA)
- **Philip E. Lammers, MD, MSCI** (Baptist Cancer Center, Memphis, TN, USA)
- **Dimitrios Farmakiotis, MD, FACP, FIDSA**; Pamela C. Egan, MD; Hina Khan, MD; Elizabeth J. Klein, BA; Adam J. Olszewski, MD; Kendra Vieira, BS (Brown University and Lifespan Cancer Institute, Providence, RI, USA)
- **Salvatore A. Del Prete, MD**; Michael H. Bar, MD, FACP; Anthony P. Gulati, MD; K. M. Steve Lo, MD; Suzanne J. Rose, MS, PhD, CCRC, FACRP; Jamie Stratton, MD; Paul L. Weinstein, MD (Carl & Dorothy Bennett Cancer Center at Stamford Hospital, Stamford, CT, USA)
- **Toni K. Choueiri, MD**; Ziad Bakouny, MD, MSc; Jean M. Connors, MD; George D. Demetri, MD, FASCO; Dory A. Freeman, BS; Antonio Giordano, MD, PhD; Chris Labaki, MD; Alicia K. Morgans, MD, MPH; Anju Nohria, MD; Andrew L. Schmidt, MD; Eliezer M. Van Allen, MD; Pier Vitale Nuzzo, MD, PhD; Wenxin (Vincent) Xu, MD; Rebecca L. Zon, MD (Dana-Farber Cancer Institute, Boston, MA, USA)
- **Susan Halabi, PhD, FASCO, FSCT, FASA**; Hannah Dzimitrowicz, MD; Tian Zhang, MD, MHS (Duke Cancer Institute at Duke University Medical Center, Durham, NC, USA)
- **Gary H. Lyman, MD, MPH, FASCO, FRCP**; Jerome J. Graber MD, MPH; Petros Grivas, MD, PhD; Jessica E. Hawley, MD; Elizabeth T. Loggers, MD, PhD; Ryan C. Lynch, MD; Elizabeth S. Nakasone, MD, PhD; Michael T. Schweizer, MD; Lisa Tachiki, MD; Shaveta Vinayak, MD, MS; Michael J. Wagner, MD; Albert Yeh, MD (Fred Hutchinson Cancer Research Center/University of Washington/Seattle Cancer Care Alliance, Seattle, WA, USA)
- **Na Tosha N. Gatson, MD, PhD, FAAN**; Joseph Vadakara, MD; Yvonne Dansoa, DO; Kristena Yossef, MD; and Mina Makary, MD (Geisinger Health System, PA, USA)
- **Sharad Goyal, MD**; Minh-Phuong Huynh-Le, MD, MAS (George Washington University, Washington, DC, USA)
- **Peter Paul Yu, MD, FACP, FASCO**; Jessica M. Clement, MD; Ahmad Daher, MD; Mark E. Dailey, MD; Rawad Elias, MD; Asha Jayaraj, MD; Emily Hsu, MD; Alvaro G. Menendez, MD; Oscar K. Serrano, MD, MBA, FACS (Hartford HealthCare Cancer Institute, Hartford, CT, USA)
- **Clara Hwang, MD**; Shirish M. Gadgeel, MD (Henry Ford Cancer Institute, Henry Ford Hospital, Detroit, MI, USA)
- **Melissa K. Accordino, MD, MS**; Divaya Bhutani, MD; Dawn Hershman, MD, MS, FASCO; Gary K. Schwartz, MD (Herbert Irving Comprehensive Cancer Center at Columbia University, New York, NY, USA)
- **Daniel Y. Reuben, MD, MS**; Mariam Alexander, MD, PhD; Sara Matar, MD; Sarah Mushtaq, MD (Hollings Cancer Center at the Medical University of South Carolina, Charleston, SC, USA)
- **Eric H. Bernicker, MD** (Houston Methodist Cancer Center, Houston, TX, USA)
- **Erika Ruiz-García, MD, MCs**; Ana Ramirez, MD; Diana Vilar-Compte, MD, MsC (Instituto Nacional de Cancerología, Mexico City, Mexico)
- **Sandeep H. Mashru, MD**; Abdul-Hai Mansoor, MD (Kaiser Permanente Northwest, OR/WA, USA)

- **Brandon Hayes-Lattin, MD, FACP**; Aaron M. Cohen, MD, MS; Shannon McWeeney, PhD; Eneida R. Nemecek, MD, MS, MBA; Staci P. Williamson, BS (Knight Cancer Institute at Oregon Health and Science University, Portland, OR, USA)
- **Howard A. Zaren, MD, FACS**; Stephanie J. Smith, RN, MSN, OCN (Lewis Cancer & Research Pavilion @ St. Joseph's/Candler, Savannah, GA, USA)
- **Gayathri Nagaraj, MD**; Mojtaba Akhtari, MD; Dan R. Castillo, MD; Eric Lau, DO; Mark E. Reeves, MD, PhD (Loma Linda University Cancer Center, Loma Linda, CA, USA)
- **Stephanie Berg, DO**; Natalie Knox; Timothy E. O'connor, MD (Loyola University Medical Center, Maywood, IL, USA)
- **Eric B. Durbin, DrPH, MS** (Markey Cancer Center at the University of Kentucky, Lexington, KY, USA)
- **Nathaniel Bouganim, MD, FRCP(C)**; Arielle Elkrief, MD, FRCP(C); Justin Panasci; Donald C. Vinh, MD, FRCP(C) (McGill University Health Centre, Montreal, QC, Canada)
- **Rahul Nanchal, MD; Harpreet Singh, MD** (Medical College of Wisconsin, Milwaukee, WI, USA)
- **Bryan Faller, MD** (Missouri Baptist Medical Center, St. Louis, MO, USA)
- **Jessica Y. Islam, PhD, MPH**; Mohammed E. Alomar, MD (Moffitt Cancer Center, Tampa, FL, USA)
- **Rana R. McKay, MD**; Archana Ajmera, MSN, ANP-BC, AOCNP; Sharon S. Brouha, MD, MPH; Angelo Cabal, BS; Sharon Choi, MD, PhD; Albert Hsiao, MD, PhD; Jun Yang Jiang, MD; Seth Kligerman, MD; Taylor K. Nonato; Erin G. Reid, MD (Moores Comprehensive Cancer Center at the University of California, San Diego, La Jolla, CA, USA)
- **Lisa B. Weissmann, MD**; Chinmay Jani, MD; Carey C. Thomson, MD, FCCP, MPH (Mount Auburn Hospital, Cambridge, MA, USA)
- **Sibel Blau, MD** (Northwest Medical Specialties, Tacoma, WA, USA)
- **Sachin R. Jhavar, MD**; Daniel Addison, MD; James L. Chen, MD; Margaret E. Gatti-Mays, MD; Vidhya Karivedu, MBBS; Joshua D. Palmer, MD; Daniel G. Stover, MD; Sarah Wall, MD; Nicole O. Williams, MD (The Ohio State University Comprehensive Cancer Center, Columbus, OH, USA)
- **Monika Joshi, MD, MRCP**; Hyma V. Polimera, MD; Lauren D. Pomerantz; Marc A. Rovito, MD, FACP (Penn State Health/Penn State Cancer Institute/St. Joseph Cancer Center, PA, USA)
- **Hagen F. Kennecke, MD, MHA, FRCPC** (Providence Cancer Institute, Portland, OR, USA)
- **Elizabeth A. Griffiths, MD**; Amro Elshoury, MBBCh (Roswell Park Comprehensive Cancer Center, Buffalo, NY, USA)
- **Salma K. Jabbour, MD**; Christian F. Misdary, MD; Mansi R. Shah, MD (Rutgers Cancer Institute of New Jersey at Rutgers Biomedical and Health Sciences, New Brunswick, NJ, USA)
- **Gerald Batist, MD, FACP, FRCP**; Erin Cook, MSN; Miriam Santos Dutra, PhD; Cristiano Ferrario, MD; Wilson H. Miller Jr., MD, PhD (Segal Cancer Centre, Jewish General Hospital, McGill University, Montreal, QC, Canada)
- **Sumit A. Shah, MD, MPH**; Elwyn C. Cabebe, MD; Michael J. Glover, MD; Alok Kumar Jha, PhD; Ali Raza Khaki, MD; Lidia Schapira, MD, FASCO; Julie Tsu-Yu Wu, MD, PhD (Stanford Cancer Institute at Stanford University, Palo Alto, CA, USA)
- **Karen Russell, MD, FACP**; Karen DeCardenas, RN, BSN; Brittany Stith, RN, BSN, OCN, CCRP (Tallahassee Memorial Healthcare, Tallahassee, FL, USA)
- **Alyson Fazio, APRN-BC**; Julie C. Fu, MD; Kathryn E. Huber, MD; Mark H. Sueyoshi, MD (Tufts Medical Center Cancer Center, Boston and Stoneham, MA, USA)
- **Jonathan Riess, MD, MS**; Kanishka G. Patel, MD (UC Davis Comprehensive Cancer Center at the University of California at Davis, CA, USA)
- **Samuel M. Rubinstein, MD; William A. Wood, MD, MPH**; Tessa M. Andermann, MD; Christopher Jensen, MD (UNC Lineberger Comprehensive Cancer Center, Chapel Hill, NC, USA)
- **Trisha M. Wise-Draper, MD, PhD**; Syed A. Ahmad, MD, FACS; Punita Grover, MD; Shuchi Gulati, MD, MS; Jordan Kharofa, MD; Tahir Latif, MBBS, MBA; Michelle Marcum, MS; Hira G. Shaikh; MD; Davendra P. Sohal, MD, MPH (University of Cincinnati Cancer Center, Cincinnati, OH, USA)
- **Jared D. Acoba, MD**; Young Soo Rho, MD, CM (University of Hawai'i Cancer Center, Honolulu, HI, USA)

- **Lawrence E. Feldman, MD; Kent F. Hoskins, MD;** Gerald Gantt Jr., MD; Li C. Liu, PhD; Mahir Khan, MD; Ryan H. Nguyen, DO; Mary Pasquinelli, APN, DNP; Candice Schwartz, MD; Neeta K. Venepalli, MD, MBA (University of Illinois Hospital & Health Sciences System, Chicago, IL, USA)
- **Praveen Vikas, MD** (University of Iowa Holden Comprehensive Cancer Center, Iowa City, IA, USA)
- **Elizabeth Wulff-Burchfield, MD;** Anup Kasi MD, MPH; Crosby D. Rock, MD (The University of Kansas Cancer Center, Kansas City, KS, USA)
- **Christopher R. Friese, PhD, RN, AOCN, FAAN; Leslie A. Fecher, MD** (University of Michigan Rogel Cancer Center, Ann Arbor, MI, USA)
- **Blanche H. Mavromatis, MD;** Ragneel R. Bijjula, MD; Qamar U. Zaman, MD (UPMC Western Maryland, Cumberland, MD, USA)
- **Jeremy L. Warner, MD, MS, FAMIA, FASCO;** Alicia Beeghly-Fadiel, PhD; Alaina J. Brown, MD, MPH; Lawrence Justin Charles, MD; Alex Cheng, PhD; Marta A. Crispens, MD; Sarah Croessmann, PhD; Elizabeth J. Davis, MD; Kyle T. Enriquez, MSc BS; Erin A. Gillaspie, MD, MPH; Daniel Hausrath, MD; Douglas B. Johnson, MD, MSCI; Xuanyi Li, MD; Sanjay Mishra, MS, PhD; Lauren S. Prescott; MD, MPH; Sonya A. Reid, MD, MPH; Brian I. Rini, MD, FACP, FASCO; David A. Slosky, MD; Carmen C. Solorzano, MD, FACS; Matthew D. Tucker, MD; Karen Vega-Luna, MA; Lucy L. Wang, BA (Vanderbilt-Ingram Cancer Center at Vanderbilt University Medical Center, Nashville, TN, USA)
- **David M. Aboulafia, MD;** Brett A. Schroeder, MD (Virginia Mason Cancer Institute, Seattle, WA, USA)
- **Matthew Puc, MD;** Theresa M. Carducci, MSN, RN, CCRP; Karen J. Goldsmith, BSN, RN; Susan Van Loon, RN, CTR, CCRP (Virtua Health, Marlton, NJ, USA)
- **Wilhelmina D. Cabalona, MD;** Sandra Cyr (Wentworth-Douglass Hospital, Dover, NH, USA)
- **Mehmet A. Bilen, MD;** Cecilia A. Castellano; Deepak Ravindranathan, MD, MS (Winship Cancer Institute of Emory University, Atlanta, GA, USA)

## Supplementary Methods

Before conducting the multivariable data analyses to evaluate the primary hypothesis, multiple imputation was performed (with 10 imputations) for the missing values in covariates (not including COVID-19 outcome variables for 30-day mortality or peak disease severity) using additive regression, bootstrapping, and predictive mean matching, where the outcomes were included when imputing covariates. The imputation method took all aspects of uncertainty of the imputations into account by using bootstrap to approximate the process of drawing predicted values from a full Bayesian predictive distribution (see `aregImpute` in `Hmisc` package for the details). Of note, the unknown Eastern Cooperative Oncology Group performance status was not treated as missing, and patients with missing outcomes were excluded in the multivariable data analysis.

To reduce the overall imbalance of the confounding variables among the study groups in the non-randomized study we balanced the distribution of covariates between the three study groups using inverse probability treatment weighting (IPTW) with truncation from a multinomial logistic regression model. The covariates balanced between groups are age (as a continuous variable truncated at 90 years due to HIPAA requirements), biologic sex (female; male), race (non-Hispanic White; Hispanic; non-Hispanic Black; other), smoking status (current or former smoker; never smoker), Eastern Cooperative Oncology Group performance status (ECOG PS 0; 1;  $\geq 2$ ), baseline corticosteroid use (none;  $\leq 10$ mg/day prednisone dose equivalent [PDE];  $> 10$ mg/day PDE), lymphopenia (absolute lymphocyte count [ALC],  $\leq 1000$  versus  $> 1000$  per  $\mu\text{L}$ ), modified Charlson Comorbidity Index (mCCI, 0; 1;  $\geq 2$ ; Supplementary Table 1), cancer status (active and progressing versus not active and progressing), cancer type (solid organ tumor; hematologic neoplasm; both), and recent systemic anti-cancer therapy (any of cytotoxic chemotherapy, immunotherapy, targeted therapy, or endocrine therapy in the 3 months prior to COVID-19 diagnosis, or not). We controlled the distribution balance of covariates via the probability weights which were obtained from a multinomial logistic regression model and truncated at the lower and upper 2.5th percentiles (i.e., the extremely small and large weights were bounded at the lower and upper 2.5th percentiles). Finally, we applied the generalized linear model - logistic regression method with clinically and biologically pre-determined significant covariates. After the 10-run analyses, i.e., truncated IPTW and logistic regression analysis were sequentially applied in each of the 10 imputed datasets, the reported adjusted odds ratios (AORs) were the average of the results. In addition, we conducted variable selection using the lasso penalty with the optimal lambda that minimized the cross-validated error, which further verified the pre-determined covariates selected.

The secondary endpoints were the rates of ICU admission/MV among cancer patients vaccinated with two and three doses of mRNA vaccines and those unvaccinated, and who developed COVID-19, following the same analysis procedure as previously stated (Supplementary Table 4).

Several sensitivity analyses were performed for the primary and secondary endpoints: (i) we considered the truncated IPTW with truncations at the lower and upper 2.5th percentile for comparing the three groups after removing the cases with "possible" vaccination status (Supplementary Table 7), (ii) IPTW with truncation at the lower and upper 1st percentile for comparing the three groups (Supplementary Table 8), (iii) IPTW followed by a multivariable logistic regression with the addition of cancer stage as a covariate (Supplementary Table 9), (iv) IPTW followed by a multivariable logistic regression with cluster-robust standard errors to adjust the estimates for the participating institution (Supplementary Table 10), (v) IPTW and multivariable logistic regression comparing the three study groups diagnosed with COVID-19 from October 2021 to March 2022 only (Supplementary Table 11), (vi) IPTW and multivariable logistic regression limited to patients who received three versus two doses of mRNA vaccines (Supplementary Table 12), and (vii) a multivariable logistic regression where IPTW was not used for balancing covariates distributions (supplementary Table 13).

All data analyses were performed by YS, CH and JW using R 4.0.3 and the R packages `Hmisc` 4.4.2, `MatchIt` 4.2.0, `ipw` 1.0-11, `survey` 4.0, `sandwich` 3.0-1, and `glmnet` 4.1-1.

**Supplementary Table 1: Modified Charlson Comorbidity Index (mCCI).** The mCCI used in this analysis is based on the original CCI, with the following modifications: 1) cancer diagnosis is omitted, similar to the NCI Comorbidity (Klabunde) Index; 2) peptic ulcer disease and hemiplegia are omitted, as these are not routinely collected in the CCC19 survey. As a result, the score can range from 0 to 22.

| Characteristic                   | Original CCI points | Modified CCI points |
|----------------------------------|---------------------|---------------------|
| Myocardial infarct               | 1                   | 1                   |
| Congestive heart failure         | 1                   | 1                   |
| Peripheral vascular disease      | 1                   | 1                   |
| Cerebrovascular disease          | 1                   | 1                   |
| Dementia                         | 1                   | 1                   |
| Chronic pulmonary disease        | 1                   | 1                   |
| Connective tissue disease        | 1                   | 1                   |
| Peptic ulcer disease             | 1                   | -                   |
| Mild liver disease               | 1                   | 1                   |
| Uncomplicated diabetes           | 1                   | 1                   |
| Hemiplegia                       | 2                   | -                   |
| Moderate or severe renal disease | 2                   | 2                   |
| Diabetes with end organ damage   | 2                   | 2                   |
| Any tumor                        | 2                   | -                   |
| Leukemia                         | 2                   | -                   |
| Lymphoma                         | 2                   | -                   |
| Moderate or severe liver disease | 3                   | 3                   |
| Metastatic solid tumor           | 6                   | -                   |
| AIDS                             | 6                   | 6                   |

## Supplementary Table 2: Data dictionary used for the analysis

The full CCC19 data dictionary and R code to generate the derived variables is publicly available on GitHub:

[https://github.com/covidncancer/CCC19\\_dictionary](https://github.com/covidncancer/CCC19_dictionary)

| Outcome description                                           | Outcome variable name | Outcome values                                                                                        |
|---------------------------------------------------------------|-----------------------|-------------------------------------------------------------------------------------------------------|
| 30-day all-cause mortality ( <b>primary outcome measure</b> ) | der_dead30            | 0 = No; 1 = Yes; 99 = Unknown                                                                         |
| Ordinal severity of COVID-19                                  | der_ordinal_v1        | 0 = not hospitalized; 1 = hospitalized; 2 = ICU; 3 = mechanical ventilation; 4 = death within 30 days |
| Hospitalization (ever)                                        | der_hosp              | 0 = No; 1 = Yes; 99 = Unknown                                                                         |
| ICU or mechanical ventilation (ever)                          | der_ICU_mv            | 0 = No; 1 = Yes                                                                                       |

| Covariate description                                                                                                                                            | Variable name        | Possible covariate values                                                                                                                                                                                                                                                                                                                           |
|------------------------------------------------------------------------------------------------------------------------------------------------------------------|----------------------|-----------------------------------------------------------------------------------------------------------------------------------------------------------------------------------------------------------------------------------------------------------------------------------------------------------------------------------------------------|
| Vaccination status prior to COVID-19 diagnosis <sup>1</sup><br>( <b>primary stratification variable</b> )                                                        | der_vax_count_before | <ul style="list-style-type: none"> <li>• 0 doses before</li> <li>• 2 mrna doses before, definite</li> <li>• 2 mrna doses before, probable</li> <li>• 2 mrna doses before, possible<sup>2</sup></li> <li>• 3+ mrna doses before, definite</li> <li>• 3+ mrna doses before, probable</li> <li>• 3+ mrna doses before, possible<sup>2</sup></li> </ul> |
| Age                                                                                                                                                              | der_age_trunc        | Integer (ages younger than 18 years are truncated to 18; ages older than 89 years are truncated to 90)                                                                                                                                                                                                                                              |
| Sex                                                                                                                                                              | der_sex              | <ul style="list-style-type: none"> <li>• Male</li> <li>• Female</li> </ul>                                                                                                                                                                                                                                                                          |
| Race/ethnicity                                                                                                                                                   | der_race             | <ul style="list-style-type: none"> <li>• Non-Hispanic White</li> <li>• Hispanic</li> <li>• Non-Hispanic Black</li> <li>• Other</li> </ul>                                                                                                                                                                                                           |
| Smoking status                                                                                                                                                   | der_smoking2         | <ul style="list-style-type: none"> <li>• Never</li> <li>• Current or Former</li> <li>• Unknown</li> </ul>                                                                                                                                                                                                                                           |
| ECOG performance status                                                                                                                                          | der_ecogcat2         | <ul style="list-style-type: none"> <li>• 0</li> <li>• 1</li> <li>• 2+</li> <li>• Unknown</li> </ul>                                                                                                                                                                                                                                                 |
| Baseline steroid use                                                                                                                                             | der_steroids_bl_10   | <ul style="list-style-type: none"> <li>• None</li> <li>• 10 mg prednisone dose-equivalent (PDE) or less per day</li> <li>• More than 10 mg PDE per day</li> <li>• Unknown</li> </ul>                                                                                                                                                                |
| Categorical lymphopenia, including whether labs were drawn or not. For this variable, lymphopenia is defined as absolute lymphocyte count <1500/uL               | der_lymphopenia      | <ul style="list-style-type: none"> <li>• Not lymphopenic</li> <li>• Lymphopenic</li> <li>• Not drawn/Not available</li> <li>• Unknown</li> </ul>                                                                                                                                                                                                    |
| Dichotomized lymphopenia at a threshold of 1000/uL <sup>3</sup>                                                                                                  | transformed_alc_v2   | <ul style="list-style-type: none"> <li>• &lt;=1000</li> <li>• &gt;1000</li> </ul>                                                                                                                                                                                                                                                                   |
| Modified Charlson comorbidity index <sup>4</sup>                                                                                                                 | der_ccc19cci_v4      | <ul style="list-style-type: none"> <li>• 0</li> <li>• 1</li> <li>• 2+</li> </ul>                                                                                                                                                                                                                                                                    |
| Cancer active and progressing at the time of COVID-19 diagnosis                                                                                                  | der_cancer_prog_bl   | 0 = No; 1 = Yes; 99 = Unknown                                                                                                                                                                                                                                                                                                                       |
| Cancer type                                                                                                                                                      | der_cancer_type      | <ul style="list-style-type: none"> <li>• Solid organ tumor</li> <li>• Hematologic neoplasm</li> <li>• Both</li> </ul>                                                                                                                                                                                                                               |
| Any systemic anti-cancer therapy (cytotoxic chemotherapy, immunotherapy, targeted therapy, and/or endocrine therapy) in the 3 months prior to COVID-19 diagnosis | der_any_systemic_3mo | 0 = No; 1 = Yes; 99 = Unknown                                                                                                                                                                                                                                                                                                                       |
| Year of COVID-19 diagnosis                                                                                                                                       | dx_year              | 2020; 2021; 2022                                                                                                                                                                                                                                                                                                                                    |
| Estimated quarter of COVID-19 diagnosis using the midpoint of the diagnostic interval                                                                            | der_quarter_mid_dx   | Q1 2020; Q2 2020; Q3 2020; Q4 2020; Q1 2021; Q2 2021; Q3 2021; Q4 2021; Q1 2022                                                                                                                                                                                                                                                                     |
| <i>Earliest</i> date that COVID-19 could have been diagnosed                                                                                                     | meta_lefttime_lb     | POSIXlt date, e.g., "2020-01-01 12:00:00 CDT"                                                                                                                                                                                                                                                                                                       |
| <i>Latest</i> date that COVID-19 could have been diagnosed                                                                                                       | meta_lefttime_ub     | POSIXlt date, e.g., "2020-12-31 12:00:00 CDT"                                                                                                                                                                                                                                                                                                       |

<sup>1</sup>Due to the phrasing of the vaccination variable "sars\_vax" in the CCC19 survey, it is possible that a respondent could misinterpret the variable and report vaccine doses received both before and after the COVID-19 diagnosis. To ameliorate this possibility, additional variables were added specifically asking whether all doses were received before the COVID-19 diagnosis, but these new variables are incompletely



filled. In order to address the uncertainty, vaccination before COVID-19 status is ascertained as “definite”, “probable”, and “possible” based on the timing of the report relative to the diagnosis of COVID-19, as well as whether the additional specific variables are filled.

Definite cases are defined as those for which patients have been directly determined to have received all mRNA vaccines (i.e. 2 or 3 doses, depending on each patient) before COVID-19 diagnosis.

Probable cases are defined among patients who have not been directly determined to have received all mRNA vaccines (i.e. 2 or 3 doses, depending on each patient), based on vaccination status (i.e. 2 or 3 doses of mRNA vaccines), as (1) those for which patients have developed COVID-19 at least 30 days (for 2 doses of mRNA vaccines) or 180 days (for 3 doses of mRNA vaccines) after the first vaccine dose (i.e. 30 and 180 days representing the normal intervals measured since the date of administration of the first dose of a mRNA vaccine, during which a patient is expected to have received the second and third dose of mRNA vaccine, respectively), or (2) which have developed COVID-19 recently (i.e. within the past 8 weeks) in relation to the time at which (a) the patient was reported to the CCC19 registry and (b) was indicated to have already received all mRNA vaccines (i.e. 2 or 3 doses, depending on each patient).

Possible cases are defined among patients who have received 2 or 3 doses of mRNA, but did not meet the defining criteria for definite or probable cases.

<sup>2</sup>Cases assigned this status are flagged for site queries; a sensitivity analysis excluding these categories is also reported.

<sup>3</sup>Numeric absolute lymphocyte count is optionally collected if the category value provided in the survey item *alc\_range* is High or Low; after additional transformations to account for outliers and incorrect units, numeric values of 1000/uL or less are assigned to the “<=1000” category; numeric values of greater than 1000/uL and/or categorical *der\_lymphopenia* = “Not lymphopenic” are assigned to the “>1000” category.

<sup>4</sup>This integer-based score is calculated using the point system from the original Charlson comorbidity index with modifications as described in **Supplementary Table 1**.

**Supplementary Table 3: Inclusion and exclusion criteria.** Data used in this analysis was downloaded from the CCC19 REDCap registry on 2022-06-02 at 19:56 CT .

| Criteria                                                                         | Difference | Total       |
|----------------------------------------------------------------------------------|------------|-------------|
| Starting number of cases in the CCC19 registry                                   |            | 17,558      |
| Screen failures                                                                  | -214       | 17,344      |
| Short form cases <sup>a</sup>                                                    | -940       | 16,404      |
| Passed screening but case never started                                          | -832       | 15,572      |
| Case started but not completed                                                   | -478       | 15,094      |
| Manual exclusions <sup>b</sup>                                                   | -377       | 14,717      |
| Case started prior to 2022-05-31 23:59 CT                                        | -6         | 14,711      |
| Cases with a calculable value for der_vax_before                                 | -915       | 13,796      |
| Require a diagnosis of COVID-19 in 2021 or 2022                                  | -10,573    | 3223        |
| Remove non-mRNA, other, and unknown vaccines                                     | -168       | 3055        |
| Exclude cases with quality score of 5+                                           | -69        | 2986        |
| Exclude cases with unknown 30-day all-cause mortality                            | -3         | 2983        |
| Require laboratory confirmation of SARS-CoV-2 <sup>c</sup>                       | -49        | 2934        |
| Missing quarter time                                                             | -4         | 2930        |
| Remove vaccinated after COVID-19, “partially” vaccinated, unknown vaccine timing | -44        | 2486        |
| <b>Final total</b>                                                               |            | <b>2486</b> |

<sup>a</sup>Short form cases have limited details and are not used in analyses

<sup>b</sup>Reasons for manual exclusion include identification of duplicated records; non-eligible cases (*in situ* solid malignancies, non-invasive non-melanoma skin cancers, precursor hematologic conditions, and benign hematologic conditions), and false-positive SARS-CoV-2 tests.

<sup>c</sup>Laboratory confirmation includes PCR testing, antigen testing, and serology (antibodies to SARS-CoV-2)

**Supplementary Table 4: Standardized mean differences before and after inverse probability treatment weighting (IPTW) of all included variables**

| Characteristics                     | SMD (pre-IPTW) | SMD (post-IPTW) |
|-------------------------------------|----------------|-----------------|
| Age                                 | 0.179          | 0.027           |
| Sex                                 | 0.041          | 0.034           |
| Race                                | 0.258          | 0.058           |
| Smoking status                      | 0.077          | 0.017           |
| ECOG Performance Status             | 0.273          | 0.057           |
| Baseline corticosteroids            | 0.092          | 0.023           |
| Lymphopenia <1000/uL                | 0.103          | 0.024           |
| Modified Charlson Comorbidity Index | 0.081          | 0.023           |
| Cancer status                       | 0.056          | 0.005           |
| Cancer type                         | 0.263          | 0.048           |
| Recent systemic anti-cancer therapy | 0.191          | 0.052           |

Abbreviations: ECOG: Eastern Cooperative Oncology Group

**Supplementary Table 5:** Distribution of patients with cancer in each of the three cohorts analyzed (i.e. unvaccinated, 2 and 3 doses of mRNA vaccines) according to the categories of solid and hematological malignancies.

|                           | <b>Unvaccinated<br/>(n= 1537)</b> | <b>2 doses of mRNA<br/>vaccines<br/>(n=564)</b> | <b>3 doses of mRNA<br/>vaccines<br/>(n=385)</b> |
|---------------------------|-----------------------------------|-------------------------------------------------|-------------------------------------------------|
| <b>Type of malignancy</b> |                                   |                                                 |                                                 |
| Breast                    | 282 (18%)                         | 101 (18%)                                       | 82 (21%)                                        |
| GI                        | 211 (14%)                         | 70 (12%)                                        | 42 (11%)                                        |
| Gynecological or GU       | 305 (20%)                         | 105 (19%)                                       | 54 (14%)                                        |
| Thoracic                  | 160 (10%)                         | 64 (11%)                                        | 23 (6%)                                         |
| Other solid               | 241 (16%)                         | 59 (10%)                                        | 32 (8%)                                         |
| Myeloid                   | 74 (5%)                           | 28 (5%)                                         | 33 (9%)                                         |
| Lymphoid                  | 260 (17%)                         | 135 (24%)                                       | 114 (30%)                                       |
| Other hematologic         | <5 (0%)                           | <5 (0%)                                         | 5 (1%)                                          |

Abbreviations: GI: gastrointestinal; GU: genitourinary

**Supplementary Table 6:** Results of multivariable logistic regression analysis for the primary endpoint of 30-day mortality, and the secondary endpoints of ICU admission and/or MV, and hospitalization.

| Characteristics                                                                | 30-day mortality<br>Multivariable AOR (95% CI)<br>(n=2486) | ICU admission and/or MV<br>Multivariable AOR (95% CI)<br>(n=2418) | Hospitalization<br>Multivariable AOR (95%CI)<br>(n=2476) |
|--------------------------------------------------------------------------------|------------------------------------------------------------|-------------------------------------------------------------------|----------------------------------------------------------|
| <b>Vaccination Status (ref = Unvaccinated)</b>                                 |                                                            |                                                                   |                                                          |
| Two doses of mRNA vaccines                                                     | 0.62 (0.44-0.88)                                           | 0.60 (0.45-0.82)                                                  | 0.60 (0.48-0.75)                                         |
| Three doses of mRNA vaccines                                                   | 0.20 (0.11-0.36)                                           | 0.37 (0.24-0.58)                                                  | 0.35 (0.26-0.46)                                         |
| <b>Age (per 10 years increase)</b>                                             | 1.48 (1.30-1.68)                                           | 1.20 (1.09-1.33)                                                  | 1.34 (1.24-1.45)                                         |
| <b>Sex (ref = Female)</b>                                                      |                                                            |                                                                   |                                                          |
| Male                                                                           | 1.33 (0.98-1.80)                                           | 1.36 (1.05-1.76)                                                  | 1.20 (0.99-1.45)                                         |
| <b>Cancer status active and progressing (ref = not active and progressing)</b> |                                                            |                                                                   |                                                          |
| Active and progressing                                                         | 4.85 (3.40-6.93)                                           | 1.55 (1.11-2.18)                                                  | 2.15 (1.60-2.88)                                         |
| <b>Modified Charlson Comorbidity Index (ref = 0)</b>                           |                                                            |                                                                   |                                                          |
| 1                                                                              | 1.16 (0.78-1.71)                                           | 1.13 (0.81-1.57)                                                  | 1.60 (1.26-2.02)                                         |
| ≥2                                                                             | 1.20 (0.83-1.73)                                           | 1.36 (0.99-1.86)                                                  | 2.45 (1.91-3.15)                                         |
| <b>ECOG Performance Status (ref = 0)</b>                                       |                                                            |                                                                   |                                                          |
| 1                                                                              | 1.59 (0.97-2.59)                                           | 1.59 (1.11-2.28)                                                  | 1.45 (1.14-1.83)                                         |
| ≥2                                                                             | 3.86 (2.35-6.35)                                           | 2.29 (1.48-3.53)                                                  | 3.31 (2.35-4.67)                                         |
| Unknown or missing                                                             | 1.92 (1.17-3.14)                                           | 1.65 (1.13-2.41)                                                  | 1.71 (1.33-2.20)                                         |
| <b>Baseline corticosteroids (ref = none)</b>                                   |                                                            |                                                                   |                                                          |
| ≤ 10mg/day PDE                                                                 | 1.91 (1.12-3.25)                                           | 1.58 (0.97-2.56)                                                  | 1.36 (0.92-2.01)                                         |
| > 10mg/day PDE                                                                 | 1.17 (0.70-1.96)                                           | 1.18 (0.76-1.86)                                                  | 1.51 (1.06-2.14)                                         |
| <b>Lymphopenia &lt;1000/uL (ref = ≥1000/uL)</b>                                |                                                            |                                                                   |                                                          |
| Yes                                                                            | 1.33 (0.97-1.82)                                           | 1.65 (1.25-2.17)                                                  | 1.67 (1.34-2.09)                                         |
| <b>Cancer type (ref = Solid)</b>                                               |                                                            |                                                                   |                                                          |
| Hematologic                                                                    | 1.22 (0.84-1.78)                                           | 1.82 (1.35-2.44)                                                  | 1.72 (1.37-2.17)                                         |
| Both                                                                           | 1.30 (0.65-2.60)                                           | 1.83 (1.05-3.21)                                                  | 1.46 (0.90-2.38)                                         |
| <b>Race (ref = non-Hispanic White)</b>                                         |                                                            |                                                                   |                                                          |
| Non-Hispanic Black                                                             | 1.10 (0.75-1.63)                                           | 1.36 (0.98-1.90)                                                  | 1.47 (1.12-1.92)                                         |
| Hispanic                                                                       | 1.27 (0.76-2.14)                                           | 1.61 (1.06-2.44)                                                  | 1.33 (0.95-1.88)                                         |
| Other                                                                          | 0.77 (0.44-1.36)                                           | 1.34 (0.87-2.08)                                                  | 1.06 (0.76-1.47)                                         |
| <b>Smoking status (ref = non-smoker)</b>                                       |                                                            |                                                                   |                                                          |
| Current or former smoker                                                       | 1.01 (0.74-1.38)                                           | 1.20 (0.92-1.55)                                                  | 1.16 (0.96-1.40)                                         |
| <b>Recent systemic anti-cancer therapy (ref = No)</b>                          |                                                            |                                                                   |                                                          |
| Yes                                                                            | 1.04 (0.74-1.44)                                           | 0.93 (0.71-1.24)                                                  | 1.08 (0.88-1.34)                                         |

Abbreviations: AOR: Adjusted Odds Ratio, CI: confidence interval; ECOG: Eastern Cooperative Oncology Group; PDE: prednisone dose equivalent; ref: reference.

**Supplementary Table 7:** Results of the sensitivity analysis using a multivariable logistic regression model with IPTW truncated at the lower and upper 2.5<sup>th</sup> percentiles, after removing cases with “possible” vaccination status, for the primary endpoint of 30-day mortality and the secondary endpoints of ICU admission and/or MV, and hospitalization.

| Characteristics                                                                | 30-day mortality<br>Multivariable AOR (95% CI)<br>(n=2365) | ICU admission and/or MV<br>Multivariable AOR (95% CI)<br>(n=2298) | Hospitalization<br>Multivariable AOR (95%CI)<br>(n=2355) |
|--------------------------------------------------------------------------------|------------------------------------------------------------|-------------------------------------------------------------------|----------------------------------------------------------|
| <b>Vaccination Status (ref = Unvaccinated)</b>                                 |                                                            |                                                                   |                                                          |
| Two doses of mRNA vaccines                                                     | 0.59 (0.40-0.87)                                           | 0.60 (0.44-0.83)                                                  | 0.58 (0.47-0.73)                                         |
| Three doses of mRNA vaccines                                                   | 0.20 (0.11-0.37)                                           | 0.39 (0.25-0.61)                                                  | 0.34 (0.25-0.45)                                         |
| <b>Age (per 10 years increase)</b>                                             | 1.47 (1.29-1.67)                                           | 1.20 (1.08-1.34)                                                  | 1.35 (1.24-1.46)                                         |
| <b>Sex (ref = Female)</b>                                                      |                                                            |                                                                   |                                                          |
| Male                                                                           | 1.35 (0.99-1.84)                                           | 1.37 (1.05-1.78)                                                  | 1.20 (0.99-1.47)                                         |
| <b>Cancer status active and progressing (ref = not active and progressing)</b> |                                                            |                                                                   |                                                          |
| Active and progressing                                                         | 4.89 (3.42-6.99)                                           | 1.62 (1.15-2.29)                                                  | 2.14 (1.59-2.88)                                         |
| <b>Modified Charlson Comorbidity Index (ref = 0)</b>                           |                                                            |                                                                   |                                                          |
| 1                                                                              | 1.15 (0.78-1.72)                                           | 1.13 (0.80-1.59)                                                  | 1.49 (1.17-1.89)                                         |
| ≥2                                                                             | 1.13 (0.78-1.65)                                           | 1.44 (1.04-1.99)                                                  | 2.37 (1.83-3.06)                                         |
| <b>ECOG Performance Status (ref = 0)</b>                                       |                                                            |                                                                   |                                                          |
| 1                                                                              | 1.58 (0.96-2.60)                                           | 1.51 (1.05-2.17)                                                  | 1.49 (1.17-1.89)                                         |
| ≥2                                                                             | 3.90 (2.36-6.46)                                           | 2.02 (1.30-3.15)                                                  | 3.41 (2.40-4.83)                                         |
| Unknown or missing                                                             | 1.85 (1.12-3.07)                                           | 1.53 (1.04-2.27)                                                  | 1.80 (1.39-2.34)                                         |
| <b>Baseline corticosteroids (ref = none)</b>                                   |                                                            |                                                                   |                                                          |
| ≤ 10mg/day PDE                                                                 | 1.83 (1.06-3.17)                                           | 1.53 (0.93-2.52)                                                  | 1.36 (0.92-2.02)                                         |
| > 10mg/day PDE                                                                 | 1.24 (0.74-2.07)                                           | 1.27 (0.81-1.99)                                                  | 1.44 (1.01-2.04)                                         |
| <b>Lymphopenia &lt;1000/uL (ref = ≥1000/uL)</b>                                |                                                            |                                                                   |                                                          |
| Yes                                                                            | 1.43 (1.04-1.97)                                           | 1.71 (1.29-2.28)                                                  | 1.64 (1.31-2.05)                                         |
| <b>Cancer type (ref = Solid)</b>                                               |                                                            |                                                                   |                                                          |
| Hematologic                                                                    | 1.21 (0.83-1.78)                                           | 1.80 (1.33-2.44)                                                  | 1.75 (1.38-2.22)                                         |
| Both                                                                           | 1.17 (0.56-2.41)                                           | 1.88 (1.07-3.30)                                                  | 1.63 (0.99-2.67)                                         |
| <b>Race (ref = non-Hispanic White)</b>                                         |                                                            |                                                                   |                                                          |
| Non-Hispanic Black                                                             | 1.17 (0.79-1.74)                                           | 1.38 (0.98-1.95)                                                  | 1.55 (1.17-2.05)                                         |
| Hispanic                                                                       | 1.27 (0.75-2.16)                                           | 1.58 (1.03-2.42)                                                  | 1.39 (0.98-1.96)                                         |
| Other                                                                          | 0.84 (0.47-1.49)                                           | 1.45 (0.93-2.25)                                                  | 1.05 (0.75-1.47)                                         |
| <b>Smoking status (ref = non-smoker)</b>                                       |                                                            |                                                                   |                                                          |
| Current or former smoker                                                       | 1.06 (0.77-1.46)                                           | 1.22 (0.93-1.59)                                                  | 1.19 (0.98-1.44)                                         |
| <b>Recent systemic anti-cancer therapy (ref = No)</b>                          |                                                            |                                                                   |                                                          |
| Yes                                                                            | 1.00 (0.71-1.40)                                           | 0.96 (0.72-1.28)                                                  | 1.14 (0.92-1.41)                                         |

Abbreviations: AOR: Adjusted Odds Ratio, CI: confidence interval; ECOG: Eastern Cooperative Oncology Group; PDE: prednisone dose equivalent; ref: reference.

**Supplementary Table 8:** Results of the sensitivity analysis using a multivariable logistic regression model with IPTW truncated at the lower and upper 1<sup>st</sup> percentiles, for the primary endpoint of 30-day mortality and the secondary endpoints of ICU admission and/or MV, and hospitalization.

| Characteristics                                                                | 30-day mortality<br>Multivariable AOR (95% CI)<br>(n=2486) | ICU admission and/or MV<br>Multivariable AOR (95% CI)<br>(n=2418) | Hospitalization<br>Multivariable AOR (95%CI)<br>(n=2476) |
|--------------------------------------------------------------------------------|------------------------------------------------------------|-------------------------------------------------------------------|----------------------------------------------------------|
| <b>Vaccination Status (ref = Unvaccinated)</b>                                 |                                                            |                                                                   |                                                          |
| Two doses of mRNA vaccines                                                     | 0.62 (0.43-0.88)                                           | 0.60 (0.44-0.81)                                                  | 0.60 (0.48-0.75)                                         |
| Three doses of mRNA vaccines                                                   | 0.18 (0.10-0.34)                                           | 0.37 (0.23-0.59)                                                  | 0.33 (0.25-0.45)                                         |
| <b>Age (per 10 years increase)</b>                                             | 1.48 (1.31-1.69)                                           | 1.20 (1.08-1.33)                                                  | 1.34 (1.24-1.45)                                         |
| <b>Sex (ref = Female)</b>                                                      |                                                            |                                                                   |                                                          |
| Male                                                                           | 1.32 (0.98-1.80)                                           | 1.35 (1.04-1.76)                                                  | 1.20 (0.99-1.46)                                         |
| <b>Cancer status active and progressing (ref = not active and progressing)</b> |                                                            |                                                                   |                                                          |
| Active and progressing                                                         | 4.86 (3.40-6.94)                                           | 1.56 (1.11-2.21)                                                  | 2.16 (1.60-2.92)                                         |
| <b>Modified Charlson Comorbidity Index (ref = 0)</b>                           |                                                            |                                                                   |                                                          |
| 1                                                                              | 1.14 (0.77-1.69)                                           | 1.12 (0.80-1.56)                                                  | 1.62 (1.28-2.05)                                         |
| ≥2                                                                             | 1.19 (0.82-1.71)                                           | 1.36 (0.99-1.87)                                                  | 2.47 (1.91-3.18)                                         |
| <b>ECOG Performance Status (ref = 0)</b>                                       |                                                            |                                                                   |                                                          |
| 1                                                                              | 1.57 (0.96-2.57)                                           | 1.58 (1.10-2.26)                                                  | 1.44 (1.14-1.83)                                         |
| ≥2                                                                             | 3.82 (2.32-6.30)                                           | 2.28 (1.48-3.53)                                                  | 3.28 (2.32-4.64)                                         |
| Unknown or missing                                                             | 1.89 (1.15-3.10)                                           | 1.67 (1.13-2.46)                                                  | 1.69 (1.31-2.18)                                         |
| <b>Baseline corticosteroids (ref = none)</b>                                   |                                                            |                                                                   |                                                          |
| ≤ 10mg/day PDE                                                                 | 1.96 (1.14-3.36)                                           | 1.60 (0.98-2.61)                                                  | 1.38 (0.93-2.04)                                         |
| > 10mg/day PDE                                                                 | 1.17 (0.70-1.96)                                           | 1.18 (0.75-1.85)                                                  | 1.51 (1.06-2.14)                                         |
| <b>Lymphopenia &lt;1000/uL (ref = ≥1000/uL)</b>                                |                                                            |                                                                   |                                                          |
| Yes                                                                            | 1.33 (0.97-1.82)                                           | 1.66 (1.26-2.19)                                                  | 1.66 (1.33-2.08)                                         |
| <b>Cancer type (ref = Solid)</b>                                               |                                                            |                                                                   |                                                          |
| Hematologic                                                                    | 1.23 (0.84-1.79)                                           | 1.85 (1.37-2.49)                                                  | 1.73 (1.37-2.18)                                         |
| Both                                                                           | 1.34 (0.66-2.70)                                           | 1.86 (1.06-3.28)                                                  | 1.47 (0.90-2.40)                                         |
| <b>Race (ref = non-Hispanic White)</b>                                         |                                                            |                                                                   |                                                          |
| Non-Hispanic Black                                                             | 1.09 (0.74-1.61)                                           | 1.33 (0.95-1.86)                                                  | 1.42 (1.08-1.87)                                         |
| Hispanic                                                                       | 1.27 (0.76-2.12)                                           | 1.60 (1.05-2.42)                                                  | 1.33 (0.94-1.88)                                         |
| Other                                                                          | 0.77 (0.44-1.35)                                           | 1.37 (0.87-2.15)                                                  | 1.04 (0.75-1.44)                                         |
| <b>Smoking status (ref = non-smoker)</b>                                       |                                                            |                                                                   |                                                          |
| Current or former smoker                                                       | 1.02 (0.74-1.39)                                           | 1.21 (0.93-1.57)                                                  | 1.15 (0.95-1.40)                                         |
| <b>Recent systemic anti-cancer therapy (ref = No)</b>                          |                                                            |                                                                   |                                                          |
| Yes                                                                            | 1.04 (0.75-1.45)                                           | 0.95 (0.71-1.26)                                                  | 1.09 (0.88-1.35)                                         |

Abbreviations: AOR: Adjusted Odds Ratio, CI: confidence interval; ECOG: Eastern Cooperative Oncology Group; PDE: prednisone dose equivalent; ref: reference.

**Supplementary Table 9:** Results of multivariable binary logistic regression analysis using IPTW for comparing three study groups diagnosed with COVID-19, where cancer stage was included in the models for the primary endpoint of 30-day mortality, and the secondary endpoints of ICU admission and/or MV, and hospitalization.

| Characteristics                                                                | 30-day mortality<br>Multivariable AOR<br>(95% CI)<br>(n=2486) | ICU admission and/or<br>MV<br>Multivariable AOR<br>(95% CI)<br>(n=2418) | Hospitalization<br>Multivariable AOR<br>(95% CI)<br>(n=2476) |
|--------------------------------------------------------------------------------|---------------------------------------------------------------|-------------------------------------------------------------------------|--------------------------------------------------------------|
| <b>Vaccination Status (ref = Unvaccinated)</b>                                 |                                                               |                                                                         |                                                              |
| Two doses of mRNA vaccines                                                     | 0.62 (0.43-0.88)                                              | 0.60 (0.44-0.81)                                                        | 0.60 (0.48-0.74)                                             |
| Three doses of mRNA vaccines                                                   | 0.19 (0.10-0.36)                                              | 0.37 (0.24-0.58)                                                        | 0.35 (0.26-0.46)                                             |
| <b>Age (per 10 years increase)</b>                                             | 1.49 (1.31-1.69)                                              | 1.20 (1.09-1.33)                                                        | 1.34 (1.24-1.45)                                             |
| <b>Sex (ref = Female)</b>                                                      |                                                               |                                                                         |                                                              |
| Male                                                                           | 1.34 (0.99-1.81)                                              | 1.36 (1.05-1.77)                                                        | 1.19 (0.98-1.44)                                             |
| <b>Cancer status active and progressing (ref = not active and progressing)</b> |                                                               |                                                                         |                                                              |
| Active and progressing                                                         | 4.93 (3.46-7.02)                                              | 1.60 (1.12-2.27)                                                        | 2.16 (1.61-2.89)                                             |
| <b>Cancer stage (ref = Localized disease)</b>                                  |                                                               |                                                                         |                                                              |
| Disseminated                                                                   | 1.22 (0.82-1.79)                                              | 1.03 (0.74-1.42)                                                        | 1.24 (0.97-1.58)                                             |
| Unknown                                                                        | 1.08 (0.67-1.74)                                              | 1.47 (1.01-2.16)                                                        | 1.19 (0.89-1.61)                                             |
| <b>Modified Charlson Comorbidity Index (ref = 0)</b>                           |                                                               |                                                                         |                                                              |
| 1                                                                              | 1.14 (0.77-1.68)                                              | 1.13 (0.81-1.57)                                                        | 1.59 (1.26-2.01)                                             |
| ≥2                                                                             | 1.20 (0.83-1.73)                                              | 1.37 (1.00-1.89)                                                        | 2.48 (1.92-3.19)                                             |
| <b>ECOG Performance Status (ref = 0)</b>                                       |                                                               |                                                                         |                                                              |
| 1                                                                              | 1.54 (0.94-2.53)                                              | 1.59 (1.11-2.28)                                                        | 1.44 (1.14-1.82)                                             |
| ≥2                                                                             | 3.69 (2.22-6.13)                                              | 2.20 (1.42-3.41)                                                        | 3.16 (2.24-4.46)                                             |
| Unknown or missing                                                             | 1.91 (1.16-3.13)                                              | 1.55 (1.06-2.28)                                                        | 1.67 (1.30-2.15)                                             |
| <b>Baseline corticosteroids (ref = none)</b>                                   |                                                               |                                                                         |                                                              |
| ≤ 10mg/day PDE                                                                 | 1.83 (1.05-3.19)                                              | 1.49 (0.93-2.38)                                                        | 1.32 (0.90-1.93)                                             |
| > 10mg/day PDE                                                                 | 1.12 (0.66-1.89)                                              | 1.17 (0.73-1.86)                                                        | 1.45 (1.02-2.07)                                             |
| <b>Lymphopenia &lt;1000/uL (ref = ≥1000/uL)</b>                                |                                                               |                                                                         |                                                              |
| Yes                                                                            | 1.30 (0.94-1.80)                                              | 1.57 (1.20-2.07)                                                        | 1.64 (1.29-2.08)                                             |
| <b>Cancer type (ref = Solid)</b>                                               |                                                               |                                                                         |                                                              |
| Hematologic                                                                    | 1.16 (0.76-1.75)                                              | 1.78 (1.29-2.45)                                                        | 1.56 (1.21-2.00)                                             |
| Both                                                                           | 1.26 (0.63-2.51)                                              | 1.79 (1.01-3.17)                                                        | 1.39 (0.85-2.28)                                             |
| <b>Race (ref = non-Hispanic White)</b>                                         |                                                               |                                                                         |                                                              |
| Non-Hispanic Black                                                             | 1.29 (0.77-2.16)                                              | 1.65 (1.08-2.50)                                                        | 1.30 (0.93-1.83)                                             |
| Hispanic                                                                       | 1.11 (0.75-1.64)                                              | 1.37 (0.98-1.91)                                                        | 1.48 (1.14-1.93)                                             |
| Other                                                                          | 0.75 (0.42-1.33)                                              | 1.36 (0.88-2.11)                                                        | 1.07 (0.76-1.51)                                             |
| <b>Smoking status (ref = non-smoker)</b>                                       |                                                               |                                                                         |                                                              |
| Current or former smoker                                                       | 1.04 (0.76-1.44)                                              | 1.22 (0.94-1.59)                                                        | 1.18 (0.98-1.43)                                             |
| <b>Recent systemic anti-cancer therapy (ref = No)</b>                          |                                                               |                                                                         |                                                              |
| Yes                                                                            | 1.02 (0.73-1.43)                                              | 0.98 (0.74-1.30)                                                        | 1.07 (0.86-1.32)                                             |

Abbreviations: AOR: Adjusted Odds Ratio, CI: confidence interval; ECOG: Eastern Cooperative Oncology Group; PDE: prednisone dose equivalent; ref: reference.



**Supplementary Table 10:** Results of multivariable binary logistic regression analysis using IPTW truncated at the lower and upper 2.5th percentiles for comparing three study groups diagnosed with COVID-19, where cluster-robust standard errors were implemented to adjust the estimates for the participating institution (sensitivity analysis).

| Characteristics                                                                | 30-day mortality<br>Multivariable AOR (95% CI)<br>(n=2486) | ICU admission and/or MV<br>Multivariable AOR (95% CI)<br>(n=2418) | Hospitalization<br>Multivariable AOR (95%CI)<br>(n=2476) |
|--------------------------------------------------------------------------------|------------------------------------------------------------|-------------------------------------------------------------------|----------------------------------------------------------|
| <b>Vaccination Status (ref = Unvaccinated)</b>                                 |                                                            |                                                                   |                                                          |
| Two doses of mRNA vaccines                                                     | 0.62 (0.46-0.84)                                           | 0.60 (0.44-0.84)                                                  | 0.60 (0.46-0.78)                                         |
| Three doses of mRNA vaccines                                                   | 0.20 (0.12-0.33)                                           | 0.37 (0.24-0.56)                                                  | 0.35 (0.24-0.49)                                         |
| Age (per 10 years increase)                                                    | 1.48 (1.27-1.72)                                           | 1.20 (1.07-1.35)                                                  | 1.34 (1.23-1.46)                                         |
| <b>Sex (ref = Female)</b>                                                      |                                                            |                                                                   |                                                          |
| Male                                                                           | 1.33 (1.04-1.70)                                           | 1.36 (0.99-1.86)                                                  | 1.20 (1.04-1.39)                                         |
| <b>Cancer status active and progressing (ref = not active and progressing)</b> |                                                            |                                                                   |                                                          |
| Active and progressing                                                         | 4.85 (3.22-7.30)                                           | 1.55 (1.09-2.22)                                                  | 2.15 (1.55-2.98)                                         |
| <b>Modified Charlson Comorbidity Index (ref = 0)</b>                           |                                                            |                                                                   |                                                          |
| 1                                                                              | 1.16 (0.90-1.49)                                           | 1.13 (0.84-1.52)                                                  | 1.60 (1.23-2.08)                                         |
| ≥2                                                                             | 1.20 (0.89-1.62)                                           | 1.36 (1.03-1.78)                                                  | 2.45 (1.92-3.13)                                         |
| <b>ECOG Performance Status (ref = 0)</b>                                       |                                                            |                                                                   |                                                          |
| 1                                                                              | 1.59 (0.82-3.09)                                           | 1.59 (1.03-2.44)                                                  | 1.45 (1.13-1.84)                                         |
| ≥2                                                                             | 3.86 (2.25-6.64)                                           | 2.29 (1.37-3.83)                                                  | 3.31 (2.21-4.96)                                         |
| Unknown or missing                                                             | 1.92 (0.90-4.06)                                           | 1.65 (1.01-2.68)                                                  | 1.71 (1.20-2.45)                                         |
| <b>Baseline corticosteroids (ref = none)</b>                                   |                                                            |                                                                   |                                                          |
| ≤ 10mg/day PDE                                                                 | 1.91 (1.22-2.98)                                           | 1.58 (0.93-2.67)                                                  | 1.36 (0.93-1.99)                                         |
| > 10mg/day PDE                                                                 | 1.17 (0.73-1.88)                                           | 1.18 (0.86-1.64)                                                  | 1.51 (1.04-2.19)                                         |
| <b>Lymphopenia &lt;1000/uL (ref = ≥1000/uL)</b>                                |                                                            |                                                                   |                                                          |
| Yes                                                                            | 1.33 (1.00-1.76)                                           | 1.65 (1.30-2.09)                                                  | 1.67 (1.28-2.18)                                         |
| <b>Cancer type (ref = Solid)</b>                                               |                                                            |                                                                   |                                                          |
| Hematologic                                                                    | 1.22 (0.85-1.77)                                           | 1.82 (1.43-2.31)                                                  | 1.72 (1.24-2.38)                                         |
| Both                                                                           | 1.30 (0.71-2.38)                                           | 1.83 (1.02-3.30)                                                  | 1.46 (0.99-2.16)                                         |
| <b>Race (ref = non-Hispanic White)</b>                                         |                                                            |                                                                   |                                                          |
| Non-Hispanic Black                                                             | 1.10 (0.70-1.73)                                           | 1.36 (0.98-1.90)                                                  | 1.47 (1.17-1.85)                                         |
| Hispanic                                                                       | 1.27 (0.79-2.05)                                           | 1.61 (0.97-2.67)                                                  | 1.33 (0.83-2.14)                                         |
| Other                                                                          | 0.77 (0.43-1.40)                                           | 1.34 (0.88-2.06)                                                  | 1.06 (0.73-1.53)                                         |
| <b>Smoking status (ref = non-smoker)</b>                                       |                                                            |                                                                   |                                                          |
| Current or former smoker                                                       | 1.01 (0.79-1.30)                                           | 1.20 (0.94-1.52)                                                  | 1.16 (0.97-1.38)                                         |
| <b>Recent systemic anti-cancer therapy (ref = No)</b>                          |                                                            |                                                                   |                                                          |
| Yes                                                                            | 1.04 (0.74-1.45)                                           | 0.93 (0.73-1.20)                                                  | 1.08 (0.86-1.36)                                         |

Abbreviations: AOR: Adjusted Odds Ratio, CI: confidence interval; ECOG: Eastern Cooperative Oncology Group; PDE: prednisone dose equivalent; ref: reference.

**Supplementary Table 11:** Results of multivariable binary logistic regression analysis using IPTW for comparing three study groups diagnosed with COVID-19 from October 2021 to March 2022 only, for the primary endpoint of 30-day mortality, and the secondary endpoints of ICU admission and/or MV, and hospitalization (sensitivity analysis).

| <b>Characteristics</b>                                                         | <b>30-day mortality<br/>Multivariable AOR<br/>(95% CI)<br/>(n=1007)</b> | <b>ICU admission and/or<br/>MV<br/>Multivariable AOR<br/>(95% CI)<br/>(n=999)</b> | <b>Hospitalization<br/>Multivariable AOR<br/>(95% CI)<br/>(n=1007)</b> |
|--------------------------------------------------------------------------------|-------------------------------------------------------------------------|-----------------------------------------------------------------------------------|------------------------------------------------------------------------|
| <b>Vaccination Status (ref = Unvaccinated)</b>                                 |                                                                         |                                                                                   |                                                                        |
| Two doses of mRNA vaccines                                                     | 0.63 (0.33-1.22)                                                        | 0.73 (0.42-1.27)                                                                  | 0.62 (0.43-0.92)                                                       |
| Three doses of mRNA vaccines                                                   | 0.37 (0.17-0.81)                                                        | 0.57 (0.31-1.04)                                                                  | 0.45 (0.31-0.67)                                                       |
| <b>Age (per 10 years increase)</b>                                             | 1.51 (1.20-1.90)                                                        | 1.30 (1.09-1.55)                                                                  | 1.53 (1.34-1.74)                                                       |
| <b>Sex (ref = Female)</b>                                                      |                                                                         |                                                                                   |                                                                        |
| Male                                                                           | 1.64 (0.91-2.94)                                                        | 1.24 (0.76-2.01)                                                                  | 1.04 (0.77-1.41)                                                       |
| <b>Cancer status active and progressing (ref = not active and progressing)</b> |                                                                         |                                                                                   |                                                                        |
| Active and progressing                                                         | 4.53 (2.29-8.95)                                                        | 1.76 (0.97-3.20)                                                                  | 1.88 (1.25-2.83)                                                       |
| <b>ECOG Performance Status (ref = 0)</b>                                       |                                                                         |                                                                                   |                                                                        |
| 1                                                                              | 0.91 (0.36-2.29)                                                        | 1.89 (0.93-3.85)                                                                  | 1.85 (1.29-2.66)                                                       |
| ≥2                                                                             | 2.77 (1.11-6.87)                                                        | 3.91 (1.83-8.35)                                                                  | 3.35 (2.02-5.57)                                                       |
| Unknown or missing                                                             | 1.24 (0.43-3.52)                                                        | 2.84 (1.29-6.23)                                                                  | 1.75 (1.15-2.66)                                                       |

Abbreviations: AOR: Adjusted Odds Ratio, CI: confidence interval; ECOG: Eastern Cooperative Oncology Group; ref: reference.

**Supplementary Table 12:** Results of multivariable binary logistic regression analysis using IPTW truncated at the lower and upper 2.5th percentiles for comparing three study groups diagnosed with COVID-19, where only patients who received 3 doses or 2 doses were included and compared (sensitivity analysis).

| Characteristics                                                                | 30-day mortality<br>Multivariable AOR (95% CI)<br>(n=949) | ICU admission and/or MV<br>Multivariable AOR (95% CI)<br>(n=943) | Hospitalization<br>Multivariable AOR (95%CI)<br>(n=949) |
|--------------------------------------------------------------------------------|-----------------------------------------------------------|------------------------------------------------------------------|---------------------------------------------------------|
| <b>Vaccination Status (ref = Two doses of mRNA vaccines)</b>                   |                                                           |                                                                  |                                                         |
| Three doses of mRNA vaccines                                                   | 0.38 (0.20-0.71)                                          | 0.63 (0.39-1.03)                                                 | 0.58 (0.43-0.79)                                        |
| <b>Age (per 10 years increase)</b>                                             | 1.20 (0.96-1.50)                                          | 1.25 (1.02-1.53)                                                 | 1.38 (1.21-1.58)                                        |
| <b>Sex (ref = Female)</b>                                                      |                                                           |                                                                  |                                                         |
| Male                                                                           | 2.08 (1.20-3.61)                                          | 1.65 (1.04-2.62)                                                 | 1.25 (0.92-1.69)                                        |
| <b>Cancer status active and progressing (ref = not active and progressing)</b> |                                                           |                                                                  |                                                         |
| Active and progressing                                                         | 4.02 (2.11-7.67)                                          | 1.76 (0.96-3.25)                                                 | 2.23 (1.42-3.51)                                        |
| <b>Modified Charlson Comorbidity Index (ref = 0)</b>                           |                                                           |                                                                  |                                                         |
| 1                                                                              | 2.14 (1.02-4.48)                                          | 1.50 (0.84-2.66)                                                 | 1.71 (1.17-2.48)                                        |
| ≥2                                                                             | 2.55 (1.31-4.96)                                          | 1.61 (0.91-2.86)                                                 | 2.95 (2.01-4.34)                                        |
| <b>ECOG Performance Status (ref = 0)</b>                                       |                                                           |                                                                  |                                                         |
| 1                                                                              | 1.27 (0.49-3.32)                                          | 1.78 (0.92-3.46)                                                 | 1.96 (1.35-2.85)                                        |
| ≥2                                                                             | 4.06 (1.61-10.26)                                         | 2.52 (1.18-5.39)                                                 | 3.73 (2.29-6.08)                                        |
| Unknown or missing                                                             | 1.79 (0.70-4.61)                                          | 1.53 (0.71-3.30)                                                 | 1.53 (1.00-2.35)                                        |

Abbreviations: AOR: Adjusted Odds Ratio, CI: confidence interval; ECOG: Eastern Cooperative Oncology Group; PDE: prednisone dose equivalent; ref: reference.

**Supplementary Table 13:** Results of multivariable logistic regression analysis for comparing three study groups diagnosed with COVID-19, where IPTW was not used for balancing covariates distributions, for the primary and secondary endpoints.

| Characteristics                                                                | 30-day mortality<br>Multivariable AOR (95% CI)<br>(n=2486) | ICU admission and/or MV<br>Multivariable AOR (95% CI)<br>(n=2418) | Hospitalization<br>Multivariable AOR (95%CI)<br>(n=2476) |
|--------------------------------------------------------------------------------|------------------------------------------------------------|-------------------------------------------------------------------|----------------------------------------------------------|
| <b>Vaccination Status (ref = Unvaccinated)</b>                                 |                                                            |                                                                   |                                                          |
| Two doses of mRNA vaccines                                                     | 0.60 (0.42-0.85)                                           | 0.61 (0.45-0.83)                                                  | 0.61 (0.49-0.75)                                         |
| Three doses of mRNA vaccines                                                   | 0.25 (0.14-0.44)                                           | 0.42 (0.28-0.63)                                                  | 0.37 (0.28-0.48)                                         |
| <b>Age (per 10 years increase)</b>                                             | 1.43 (1.27-1.62)                                           | 1.21 (1.09-1.34)                                                  | 1.33 (1.23-1.43)                                         |
| <b>Sex (ref = Female)</b>                                                      |                                                            |                                                                   |                                                          |
| Male                                                                           | 1.37 (1.03-1.84)                                           | 1.36 (1.06-1.74)                                                  | 1.19 (0.99-1.43)                                         |
| <b>Cancer status active and progressing (ref = not active and progressing)</b> |                                                            |                                                                   |                                                          |
| Active and progressing                                                         | 4.64 (3.30-6.51)                                           | 1.54 (1.11-2.13)                                                  | 2.04 (1.54-2.70)                                         |
| <b>Modified Charlson Comorbidity Index (ref = 0)</b>                           |                                                            |                                                                   |                                                          |
| 1                                                                              | 1.26 (0.86-1.83)                                           | 1.24 (0.90-1.72)                                                  | 1.63 (1.30-2.03)                                         |
| ≥2                                                                             | 1.38 (0.97-1.97)                                           | 1.47 (1.08-1.99)                                                  | 2.48 (1.95-3.16)                                         |
| <b>ECOG Performance Status (ref = 0)</b>                                       |                                                            |                                                                   |                                                          |
| 1                                                                              | 1.70 (1.06-2.73)                                           | 1.61 (1.14-2.28)                                                  | 1.42 (1.13-1.79)                                         |
| ≥2                                                                             | 4.16 (2.58-6.71)                                           | 2.32 (1.54-3.51)                                                  | 3.36 (2.42-4.66)                                         |
| Unknown or missing                                                             | 1.93 (1.19-3.13)                                           | 1.63 (1.12-2.35)                                                  | 1.73 (1.36-2.22)                                         |
| <b>Baseline corticosteroids (ref = none)</b>                                   |                                                            |                                                                   |                                                          |
| ≤ 10mg/day PDE                                                                 | 1.66 (0.99-2.79)                                           | 1.41 (0.89-2.23)                                                  | 1.26 (0.87-1.83)                                         |
| > 10mg/day PDE                                                                 | 1.08 (0.66-1.75)                                           | 1.17 (0.76-1.79)                                                  | 1.49 (1.06-2.09)                                         |
| <b>Lymphopenia &lt;1000/uL (ref = ≥1000/uL)</b>                                |                                                            |                                                                   |                                                          |
| Yes                                                                            | 1.40 (1.03-1.89)                                           | 1.68 (1.29-2.18)                                                  | 1.63 (1.31-2.04)                                         |
| <b>Cancer type (ref = Solid)</b>                                               |                                                            |                                                                   |                                                          |
| Hematologic                                                                    | 1.14 (0.79-1.63)                                           | 1.74 (1.31-2.31)                                                  | 1.77 (1.41-2.21)                                         |
| Both                                                                           | 1.43 (0.73-2.82)                                           | 2.00 (1.16-3.44)                                                  | 1.59 (1.01-2.50)                                         |
| <b>Race (ref = non-Hispanic White)</b>                                         |                                                            |                                                                   |                                                          |
| Non-Hispanic Black                                                             | 1.06 (0.72-1.56)                                           | 1.35 (0.97-1.88)                                                  | 1.48 (1.15-1.92)                                         |
| Hispanic                                                                       | 1.16 (0.70-1.91)                                           | 1.60 (1.07-2.39)                                                  | 1.40 (1.00-1.96)                                         |
| Other                                                                          | 0.80 (0.46-1.40)                                           | 1.31 (0.86-1.99)                                                  | 1.06 (0.77-1.47)                                         |
| <b>Smoking status (ref = non-smoker)</b>                                       |                                                            |                                                                   |                                                          |
| Current or former smoker                                                       | 0.96 (0.71-1.31)                                           | 1.11 (0.86-1.43)                                                  | 1.16 (0.96-1.39)                                         |
| <b>Recent systemic anti-cancer therapy (ref = No)</b>                          |                                                            |                                                                   |                                                          |
| Yes                                                                            | 1.06 (0.77-1.46)                                           | 0.92 (0.70-1.20)                                                  | 1.11 (0.91-1.36)                                         |

Abbreviations: AOR: Adjusted Odds Ratio, CI: confidence interval; ECOG: Eastern Cooperative Oncology Group; PDE: prednisone dose equivalent; ref: reference.

**Supplementary Table 14:** Non-adjusted odds ratios and associated p-values for vaccination status subgroups in relation to primary endpoint of 30-day mortality and the secondary endpoints of ICU/MV and hospitalization.

| Vaccination Status (ref = Unvaccinated) | 30-day mortality    |          | ICU admission and/or MV |          | Hospitalization     |          |
|-----------------------------------------|---------------------|----------|-------------------------|----------|---------------------|----------|
|                                         | OR (95%CI)          | p-value  | OR (95%CI)              | p-value  | OR (95%CI)          | p-value  |
| Two doses of mRNA vaccines              | 0.77<br>(0.56-1.06) | 0.11     | 0.70<br>(0.52-0.93)     | 0.015    | 0.76<br>(0.63-0.92) | 0.0062   |
| Three doses of mRNA vaccines            | 0.33<br>(0.20-0.55) | < 0.0001 | 0.47<br>(0.32-0.69)     | < 0.0001 | 0.46<br>(0.37-0.58) | < 0.0001 |

Abbreviations: OR: Odds Ratio, CI: confidence interval; ref: reference.
